# Supplementary material
Source: PubMed Central journal article supplement (PMC3545030)
Supplement: NIHMS416143-supplement-01.pdf [file NIHMS416143-supplement-01.pdf]

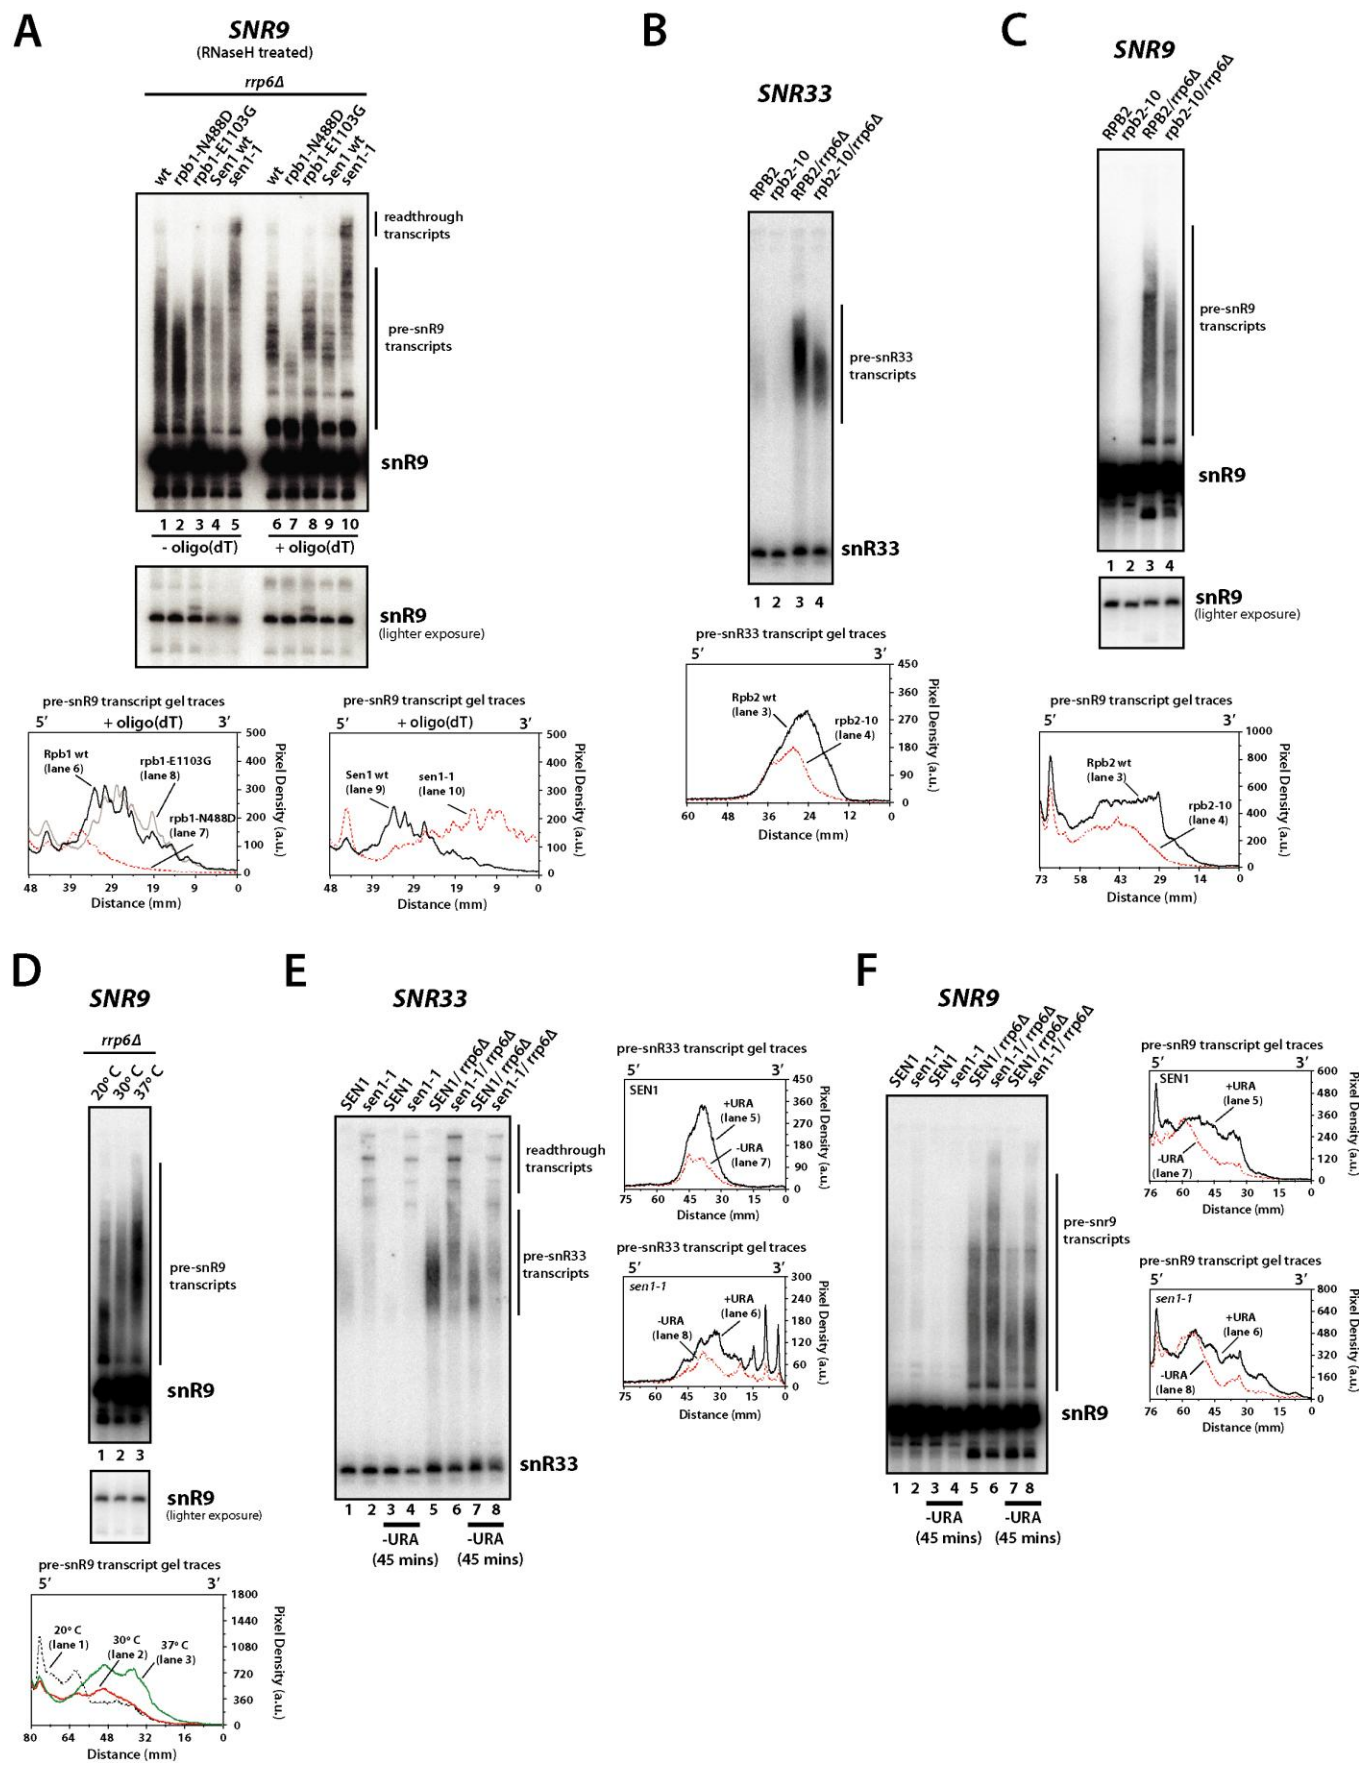

**Figure S1. Effects of Pol II mutations, temperature and uracil depletion on non-coding RNA termination windows, related to Figure 2.**

**(A)** Northern blot analysis of snoRNA gene *SNR9* with RNA from wild-type Rpb1 (wt) (YSB2697), *rpb1-N488D* (YSB2698), *rpb1-E1103G* (YSB2699), and wild-type Sen1 (YSB2859) and *sen1-1* (YSB2860) isogenic strains containing *rrp6Δ* grown at 30°C. RNA was treated with RNaseH in the absence or presence of oligo(dT).

**(B, C)** Northern blot analysis of *SNR33* and *SNR9* with RNA from *RPB2* (Z24), *rpb2-10* (Z428), *RPB2/rrp6Δ* (YSB2901) and *rpb2-10/rrp6Δ* (YSB2902) strains grown at 30°C.

**(D)** Northern blot analysis of snoRNA gene *SNR9* from wild-type Rpb1 (YSB2697) strains containing *rrp6Δ* grown at 20°C, 30°C, and 37°C.

**(E, F)** Northern blot analysis of *SNR33* and *SNR9* with RNA from *SEN1* WT (1971), *sen1-1* (FWY1), *SEN1/rrp6Δ* (YSB2859) and *sen1-1/rrp6Δ* (YSB2860) strains grown at 30°C in SC complete media (lanes 1, 2, 5, 6) or grown in SC complete and shifted to media lacking uracil (-URA) for 45 minutes prior to harvesting (lanes 3, 4, 7, 8).

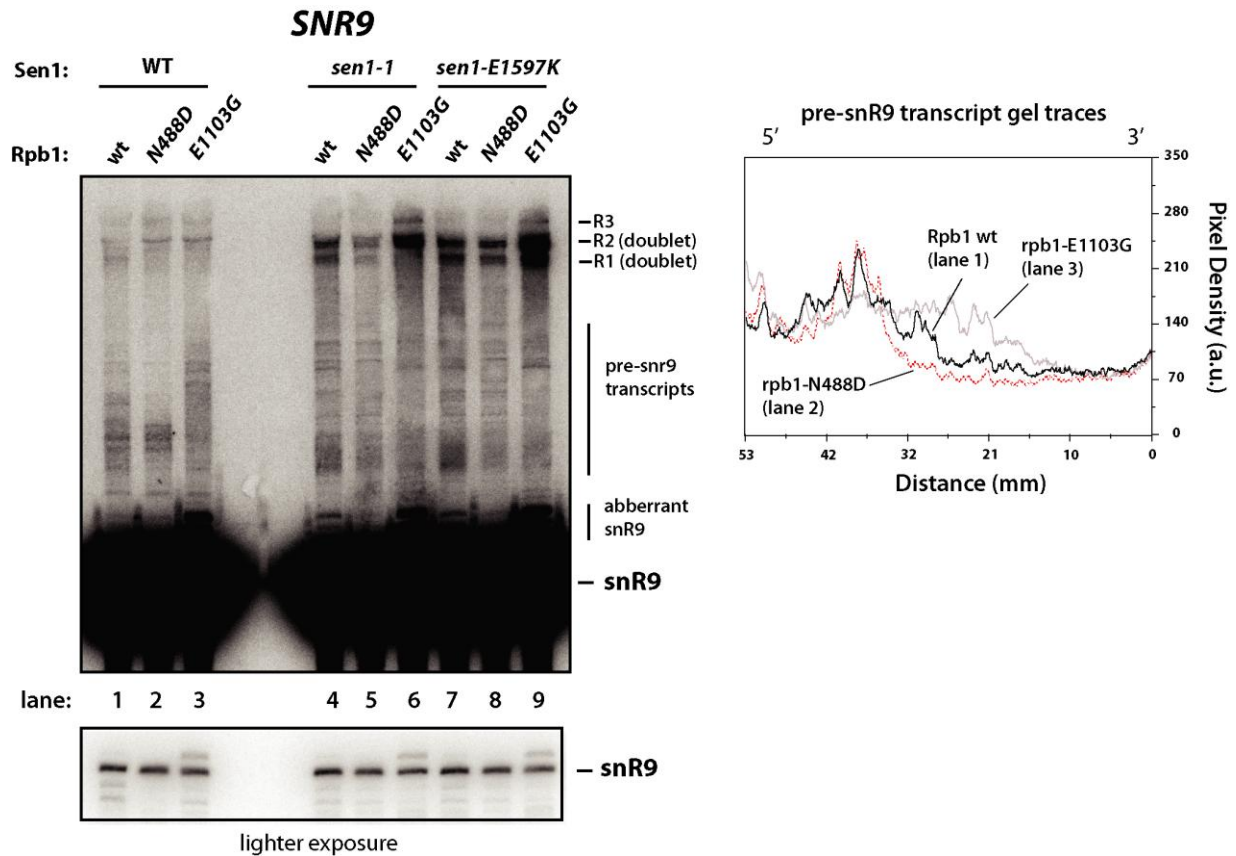

**Figure S2. Effects of Pol II and Sen1 mutations on SNR9 termination, related to figure 4.**

Northern blot analysis of snoRNA gene *SNR9* with RNA from WT (YSB2700), *rpb1-N488D* (YSB2701), *rpb1-E1103G* (YSB2702), *sen1-1* (YSB2704), *sen1-1/rpb1-N488D* (YSB2705), *sen1-1/rpb1-E1103G* (YSB2706), *sen1-E1597K* (YSB2707), *sen1-E1597K/rpb1-N488D* (YSB2708), and *sen1-E1597K/rpb1-E1103G* (YSB2709) strains grown at 30°C, wt; wild-type, R1-R3; readthrough/extended transcripts that increase in the presence of *sen1-1* and *sen1-E1597K* backgrounds.

**A**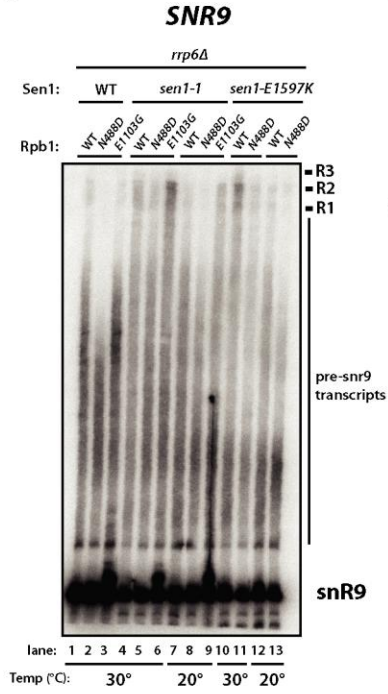**B**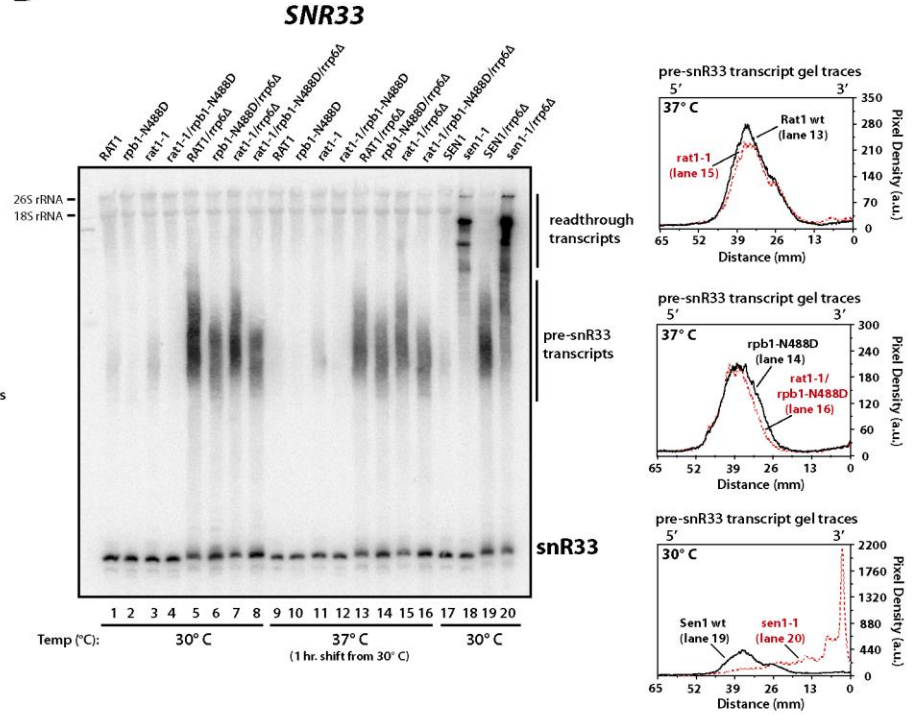**C**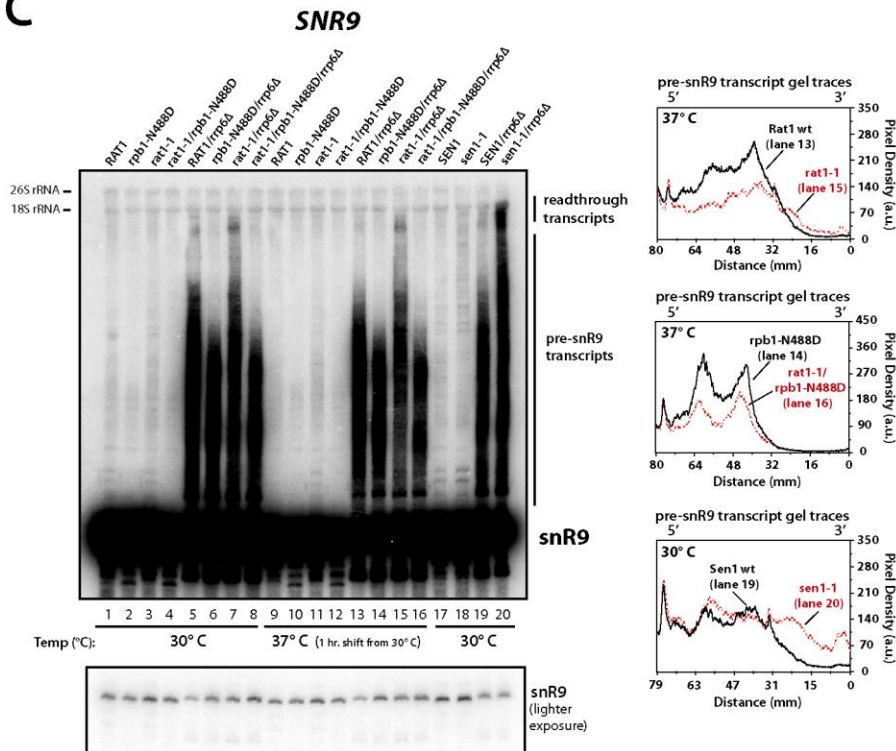**D**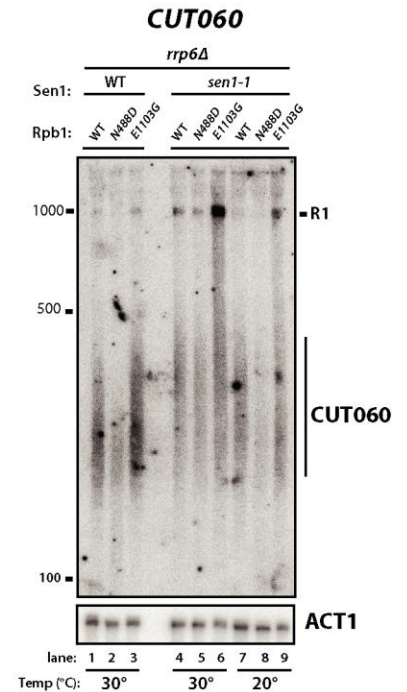

**Figure S3. Effects of Pol II, Sen1, and Rat1 mutations on non-coding RNA termination windows, related to Figure 5.**

**(A)** Northern blot analysis of *SNR9* and with RNA from WT (YSB2697), *rpb1-N488D* (YSB2698), *rpb1-E1103G* (YSB2699), *sen1-1* (YSB2711), *sen1-1/rpb1-N488D* (YSB2712), *sen1-1/rpb1-E1103G* (YSB2713), *sen1-E1597K* (YSB2714), and *sen1-E1597K/rpb1-N488D* (YSB2715), strains containing *rrp6Δ* grown at 30°C and 20°C. R1-R3; readthrough/extended transcripts whose levels increase in *sen1-1* and *sen1-E1597K* backgrounds.

**(B, C)** Northern blot analysis of *SNR33* and *SNR9* with RNA from *RAT1* (THJ2400), *rpb1-N488D* (THJ2401), *rat1-1* (THJ2402), *rat1-1/rpb1-N488D* (THJ2403), *RAT1/rrp6Δ* (YSB2909), *rpb1-N488D/rrp6Δ* (YSB2906), *rat1-1/rrp6Δ* (YSB2907), *rat1-1/rpb1-N488D/rrp6Δ* (YSB2908), *SEN1* (1971), *sen1-1* (FWY1), *SEN1/rrp6Δ* (YSB2859), and *sen1-1/rrp6Δ* (YSB2860) grown at 30°C or then shifted to 37°C for 1 hour prior to harvesting.

**(D)** Northern blot analysis of *CUT060* with RNA from indicated in (A) grown at 30°C and 20°C. ACT1 mRNA and serves as a loading control. R1; readthrough/extended transcripts whose levels increase in *sen1-1* and *sen1-E1597K* backgrounds

## Supplemental Experimental Procedures

### Yeast Strains

*RPB1* (GRY3020), *rpb1-N488D* (GRY3027), and *rpb1-E1103G* (GRY3028) strains were generously provided by Jeffrey Strathern. To introduce the *sen1-1* and *sen1-E1597K* alleles into this background, a C-terminal MYC13 tag marked with KanMX6 was integrated into strains FWY1 (*sen1-1*) (Rasmussen and Culbertson, 1998) and *nrd2-1* (*sen1-E1597K*) (Steinmetz and Brow, 1996), creating *sen1-1-Myc* and *sen1-E1597K-Myc* strains YSB2703 and YSB2573. DNA containing part of the Sen1 coding region harboring the *sen1* point mutations and the C-terminal MYC13::KanMX6 tag were amplified using PCR and used to transform *RPB1* (GRY3020), *rpb1-N488D* (GRY3027), and *rpb1-E1103G* (GRY3028) strains. Transformants were selected on G418 plates and the presence of the *sen1-1* or *sen1-E1597K* mutation was confirmed by conferral of the temperature sensitive phenotype and sequencing of the genomic *SEN1* locus. Comparison of Sen1 strains with and without the C-terminal Myc-tag show no discernable differences in snoRNA termination efficiency. Where indicated, cells were also transformed with either *rrp6Δ::KANMX* or *rrp6Δ::NATMX* cassettes.

### Yeast Growth Assays and Spot Growth Tests.

For yeast growth rate assays, overnight cultures were grown at room temperature (20°C) in YPD media and then diluted to OD<sub>600</sub> ~0.05 in YPD media and grown at 30°C. Samples were taken at indicated timepoints and optical densities were measured with a spectrophotometer. For spot growth tests, overnight cultures were grown at 20°C in YPD media and were diluted to OD<sub>600</sub> ~0.5 and spotted in three-fold dilutions on YPD-complete plates and grown at 30°C for indicated times. For spot tests on galactose plates, overnight cultures were grown at 30°C, pelleted, washed with water, and diluted to OD<sub>600</sub> ~0.1 and spotted in ten-fold dilutions on 2% galactose/SC-uracil/x-gal plates and grown at 30°C.

**Chromatin Immunoprecipitation (ChIP) Analysis.** For *in vivo* elongation rate measurement, strains GRY3020 (*RPB1*) and GRY3028 (*rpb1-E1103G*) were transformed with KpnI-digested YIplac204-Gal1-454 plasmid, containing a *TRP1* marker and the *GAL1* promoter fused to the *YLR454* open-reading frame (Mason and Struhl, 2005), generating strains YSB2716 and YSB2717. Overnight cultures in synthetic complete media with 2% raffinose were used to

inoculate larger cultures of YP-Galactose (2% yeast extract, 4% bacto-peptone, 2% galactose) to an OD<sub>600</sub> of 0.1. After growth at 30°C for 4-5 hours, pre-glucose induction samples were taken for the 0 min timepoint and crosslinked with formaldehyde. Remaining cells were centrifuged and washed with synthetic complete media lacking a carbon source and used to inoculate YP-Glucose media (2% yeast extract, 4% bacto-peptone, 4% glucose). Aliquots were removed after 2, 4, and 8 minutes as post-glucose samples and crosslinked. Chromatin preparations and immunoprecipitations were performed as described previously (Keogh and Buratowski, 2004). Precipitated or input DNA from two-independent replicates was analyzed in triplicate by quantitative PCR reactions using a Roche Lightcycler 480. Fold-enrichment values were calculated by normalizing to a non-transcribed telomeric region as previously described (Marquardt et al., 2011).

### **RNaseH oligo(dT) Treatment**

30 µg total RNA in the absence or presence of 750 ng of 28mer oligo(dT) were ethanol precipitated in 3 volumes 100% ethanol and 1/10 volume 3 M sodium acetate, pH 5.2 for overnight at -20°C. Pellets were resuspended in 9 µl water and 1 µl 10X hybridization buffer (0.25M Tris pH7.5, 10mM EDTA, 0.5M NaCl) and placed in a 68°C water bath and cooled to 30°C. 10µl 2X RNase H buffer (40mM Tris pH7.5, 20mM MgCl<sub>2</sub>, 100mM NaCl, 2mM DTT, 60 µg/ml BSA) and 1µl (1U) RNase H (Invitrogen) was added to the reactions and incubated for 60 min at 30°C. Reactions were stopped by the addition of 130 µl stop mix (40 µg/ml tRNA, 20mM EDTA, 30mM sodium acetate, pH 5.2 and extracted with phenol-choloform-isoamyl alcohol and resuspended in DEPC-treated water and subjected to Northern Analysis.

## Supplemental References

Keogh, M.C., and Buratowski, S. (2004). Using chromatin immunoprecipitation to map cotranscriptional mRNA processing in *Saccharomyces cerevisiae*. *Methods Mol Biol* 257, 1-16.

Marquardt, S., Hazelbaker, D.Z., and Buratowski, S. (2011). Distinct RNA degradation pathways and 3' extensions of yeast non-coding RNA species. *Transcription* 2, 145-154.

Mason, P.B., and Struhl, K. (2005). Distinction and relationship between elongation rate and processivity of RNA polymerase II in vivo. *Mol Cell* 17, 831-840.

Rasmussen, T.P., and Culbertson, M.R. (1998). The putative nucleic acid helicase Sen1p is required for formation and stability of termini and for maximal rates of synthesis and levels of accumulation of small nucleolar RNAs in *Saccharomyces cerevisiae*. *Mol Cell Biol* 18, 6885-6896.

Steinmetz, E.J., and Brow, D.A. (1996). Repression of gene expression by an exogenous sequence element acting in concert with a heterogeneous nuclear ribonucleoprotein-like protein, Nrd1, and the putative helicase Sen1. *Mol Cell Biol* 16, 6993-7003.





Table S1: Yeast Strains

| Identifier | Name                              |
|------------|-----------------------------------|
| GRY3020    | wild-type                         |
| GRY3027    | rpb1-N488D                        |
| GRY3028    | rpb1-E1103G                       |
| YSB2716    | GAL1-YLR454                       |
| YSB2717    | GAL1-YLR454/rpb1-E1103G           |
| YSB2697    | rrp6Δ                             |
| YSB2698    | rrp6Δ/rpb1-N488D                  |
| YSB2699    | rrp6Δ/rpb1-E1103G                 |
| YSB2700    | Sen1-myc                          |
| YSB2701    | Sen1-myc/rpb1-N488D               |
| YSB2702    | Sen1-myc/rpb1-E1103G              |
| YSB2704    | sen1-1-myc                        |
| YSB2705    | sen1-1-myc/rpb1-N488D             |
| YSB2706    | sen1-1-myc/rpb1-E1103G            |
| YSB2707    | sen1(E1597K)-myc                  |
| YSB2708    | sen1(E1597K)-myc/rpb1-N488D       |
| YSB2709    | sen1(E1597K)-myc/rpb1-E1103G      |
| YSB2711    | rrp6Δ/sen1-1-myc                  |
| YSB2712    | rrp6Δ/sen1-1-myc/rpb1-N488D       |
| YSB2713    | rrp6Δ/sen1-1-myc/rpb1-E1103G      |
| YSB2714    | rrp6Δ/sen1(E1597K)-myc            |
| YSB2715    | rrp6Δ/sen1(E1597K)-myc/rpb1-N488D |
| FWY1       | sen1-1                            |
| YSB2703    | sen1-1-myc                        |
| mrd2-1     | sen1-E1597K                       |
| YSB2573    | sen1(E1597K)-myc                  |
| YSB2859    | rrp6Δ                             |
| YSB2860    | rrp6Δ/sen1-1                      |
| 1971       | SEN1                              |
| Z24        | RPB2                              |
| Z428       | rpb2-10                           |
| YSB2901    | rrp6Δ/RPB2                        |
| YSB2902    | rrp6Δ/rpb2-10                     |
| THJ2400    | wild-type                         |
| THJ2401    | rpb1-N488D                        |
| THJ2402    | rat1-1                            |
| THJ2403    | rpb1-N488D/rat1-1                 |
| YSB2909    | rrp6Δ                             |
| YSB2906    | rrp6Δ/rpb1-N488D                  |
| YSB2907    | rrp6Δ/rat1-1                      |
| YSB2908    | rrp6Δ/rpb1-N488D/rat1-1           |

Table S2: Oligonucleotides

| Identifier | Name                 | Sequence 5' to 3'              |
|------------|----------------------|--------------------------------|
| 1617       | TEL-VI (1)           | GCGTAACAAAGCCATAATGCCTCC       |
| 1618       | TEL-VI (2)           | CTCGTTAGGATCACGTTCTGAATCC      |
| 1077       | GAL1(-194)           | CTGGGGTAATTAATCAGCGAAGCGATG    |
| 1078       | YLR454(+35)          | CACTTGTACAGTAGAACATTAATCGGAAAC |
| 2824       | YLR454w_0.5_Top      | CGCAATTAGTCAACAACGATATCACGATTG |
| 2825       | YLR454w_0.5_Bot      | CCTACTTGAAGTCCATCCTTCAGAGG     |
| 2826       | YLR454w_1.0_Top      | CAATACCAACAGTTTCAGAAATGAGATGC  |
| 2827       | YLR454w_1.0_Bot      | GAGAGAACAATTTGGTTTCGCCAAATATCG |
| 1079       | YLR454(+1986)        | CATATCATCCACCCTAGGTGCTAGGTCCG  |
| 1080       | YLR454(+2199)        | GAGCTGACCAGACCTAACCATAGTAGCGTG |
| 1081       | YLR454(+4069)        | AGATATTACTCGTTGTTCGTGCCAG      |
| 1082       | YLR454(+4268)        | TCCCAAAACCCTAGTTTAAACAGAAGG    |
| 1085       | YLR454(+7701)        | GAGGGTACAGATCTATTACTTGCCC      |
| 1086       | YLR454(+7850)        | GTTGTGAGTTGTTTCAGTGGTGAAGTG    |
| 1309       | snR13 Pro up -60     | TTATAAATGGCATCTCAAATCGTC       |
| 1310       | snR13 Pro low +124   | GGTCAGATAAAAAGTAAAAAAGGTAGC    |
| 1316       | TRS31 ORF low +922   | ATCACGGCGCCTCATCTTTG           |
| 1324       | YCR015C Pro low +556 | CGGCAGTGATCTCGTTCATTG          |
| 519        | Adh1-CDS-Low#1       | ATTTGACCCTTTCCATCTTTTCGTAA     |
| 518        | Adh1-CDS-Up#1        | TTCAACCAAGTCGTCAAGTCCATCTCTA   |
| 1311       | snR13 3UTR up +119   | CTGACCTTTTAACTTCCCCGTAG        |
| 1312       | snR13 3UTR low +359  | CTGTCTGCTCCGTGTCTCTTGTCTG      |
| 1619       | snR33 3'UTR up +208  | GTATTACTACTGAGCTTGTATATCTGT    |
| 1322       | snR33 3UTR low +288  | TAAAGAAAACGATAAGAATAACC        |
| 2436       | snR33 +12 Top Strand | CTCTTTGTACGATGGTGTCACTC        |
| 1620       | snR33 3'UTR low +347 | AATTGTTAAATGCATTGGCTCG         |
| 2353       | snR3 1F              | GTAATAATCCACCGCATTAGACAGT      |
| 2354       | snR3 1R              | CTTCTGACACTCGAGTCTCATTCA       |
| 2658       | SNR31_code_top       | GCAAATTACACCATGAGTTCC          |
| 2659       | SNR31_code_bot       | GTAGAACGAATCATGACCAAC          |
| 2357       | snR9 1F              | GAACCTTCTACGCCTTTCTCTATG       |
| 2358       | snR9 1R              | GTCTGAAGGACTAATGATAGGTGGG      |
| 2451       | CUT_60_F             | AGCTCTGGCCTTGCAATAAA           |
| 2452       | CUT_60_R             | CCCCTTCTAGACTCCA               |
| 2509       | SUT477_F             | AAAACAGCTGGGCCTTCTCT           |
| 2510       | SUT477_R             | TAAGGCGCAATCTACCGAAG           |
| 1810       | Act1 CDS 2F          | TCCTTCTGTTTTGGGTTTGAATC        |
| 1811       | Act1 CDS 2R          | CCAATCCAGACGGAGTACTTTCTTTC     |
| Struhl Lab | Oligo(dT) 28 mer     | TTTTTTTTTTTTTTTTTTTTTTTTTTTT   |
| 2985       | SCR1_F               | AGGCTGTAATGGCTTCTGGTGGGA       |
| 2986       | SCR1_R               | ACGGGCTGCCCGCAAAGATCGA         |
